# Supplementary material for: Mechanism aspects of the hydrogenation of acrylonitrile on Ni and Pd surfaces
Source: Royal Society of Chemistry journal article supplement (doi:10.1039/c6ra09295k), 2016-01-01
Supplement: c6ra09295k1.pdf [file c6ra09295k1.pdf]

# Mechanism Aspects of the Hydrogenation of Acrylonitrile on Ni and Pd Surfaces

Xin Ge <sup>ab</sup>, Jiongbin Pan <sup>a</sup>, Xinzhi Chen <sup>a</sup>, Chao Qian <sup>a\*</sup> and Shaodong Zhou <sup>c\*</sup>

<sup>a</sup> Key Laboratory of Biomass Chemical Engineering of Ministry of Education, College of Chemical and Biological Engineering, Zhejiang University, Hangzhou, P.R China.

<sup>b</sup> School of Chemical and Material Engineering, Jiangnan University, Wuxi, P.R China

<sup>c</sup> Institut für Chemie, Technische Universität Berlin, Berlin, Germany

## Outline

|                                                                                                                              |    |
|------------------------------------------------------------------------------------------------------------------------------|----|
| Experimental.....                                                                                                            | 2  |
| Fig.S2 MS spectrum of propylamine.....                                                                                       | 4  |
| Fig.S3 MS spectrum of dipropylamine.....                                                                                     | 4  |
| Fig.S4 MS spectrum of 3-(propylamino)propanenitrile .....                                                                    | 5  |
| Fig.S5 MS spectrum of 3-(dipropylamino)propanenitrile .....                                                                  | 5  |
| Fig.S6 The adsorption site, energies (in kJ/mol) structural parameters of acrylonitrile adsorbed on Ni(111) and Pd(111)..... | 6  |
| Fig.S7 Energy profile of acrylonitrile hydrogenation to propionitrile on Ni(111).....                                        | 9  |
| Fig.S8 Energy profile of acrylonitrile hydrogenation to propionitrile on Pd(111).....                                        | 11 |
| Fig.S9 Energy profile of imine formation on Ni(111).....                                                                     | 13 |
| Fig.S10 Energy profile of imine formation on Pd(111) .....                                                                   | 15 |
| Fig.S11 Energy profile of propylamine formation on Ni(111).....                                                              | 17 |
| Fig.S12 Energy profile of propylamine formation on Pd(111) .....                                                             | 19 |
| Fig.S13 Energy profile of propylene imine formation on Ni(111).....                                                          | 21 |
| Fig.S14 Energy profile of propylene imine formation on Pd(111) .....                                                         | 23 |

---

\* Corresponding author. Chao Qian, E-mail: [qianchao@zju.edu.cn](mailto:qianchao@zju.edu.cn) and Shaodong Zhou, E-mail: [shaodong.zhou@campus.tu-berlin.de](mailto:shaodong.zhou@campus.tu-berlin.de)

## Experimental

GC analyses were performed on GC Agilent 1790F series, and GC-MS analyses were performed on GC-MS Agilent 5973-6890 series. Raney Ni and Raney Cu were purchased from Zhejiang Metallurgical Research Institute Co., Ltd. The apparent density of Raney Ni is about  $3.0 \text{ g/cm}^3$  and a mean particle size is about  $16.58 \text{ }\mu\text{m}$ . All reagents and solvents were general reagent grade. All reactions were carried out in a 250 ml autoclave (Parr 4576 series), which is connected to a computer conjugated detector.

### Catalytic hydrogenation of acrylonitrile

The hydrogenation of acrylonitrile was conducted in a 250 ml autoclave Parr 4576 series with mechanical stirring, and the stirring speed, temperature and pressure were monitored and controlled online, as shown in Fig.1. The autoclave was purged with nitrogen for three times and then with hydrogen for another three times, then filled with hydrogen of 2.0 MPa at room temperature. The hydrogen pressure in the hydrogen reservoir (2 L) was maintained at 5.0 MPa, then the inflow valve **2** was shut up. Subsequently, the mixture was heated to 363 K and the pressure increased to 2.2 MPa. Next, the stirring was started and the connection valve **8** was opened and controlled to adjust pressure in the autoclave. Via a pressure sensor that is adapted for online communication, the reaction was monitored with a remote computer. When the cumulative hydrogen absorption capacity achieved the theoretical value or the slope of the hydrogen absorption curve was greatly degraded, the reaction and the data collection was over. The experiment data of hydrogen pressure and reaction time was auto-recorded by computer. Raney Ni was recovered by filtration and washed by methanol. The final product was analyzed by GC or GC-MS.

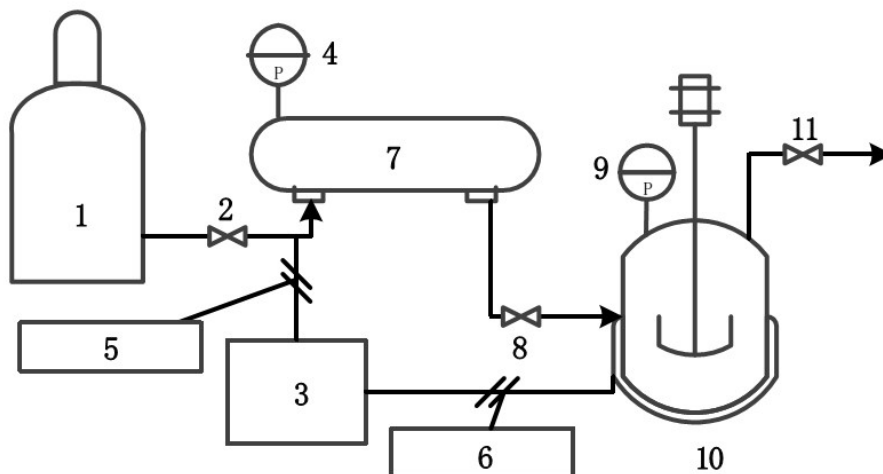

**Fig.S1** Experimental device of acrylohydrogenation of nitrile

1-Hydrogen source; 2,8,11-valve; 3-computer; 4,9-hydrogen pressure gauge; 5-pressure sensor; 6-temperature sensor; 7- hydrogen reservoir; 10-autoclave

**Fig.S2 MS spectrum of propylamine**

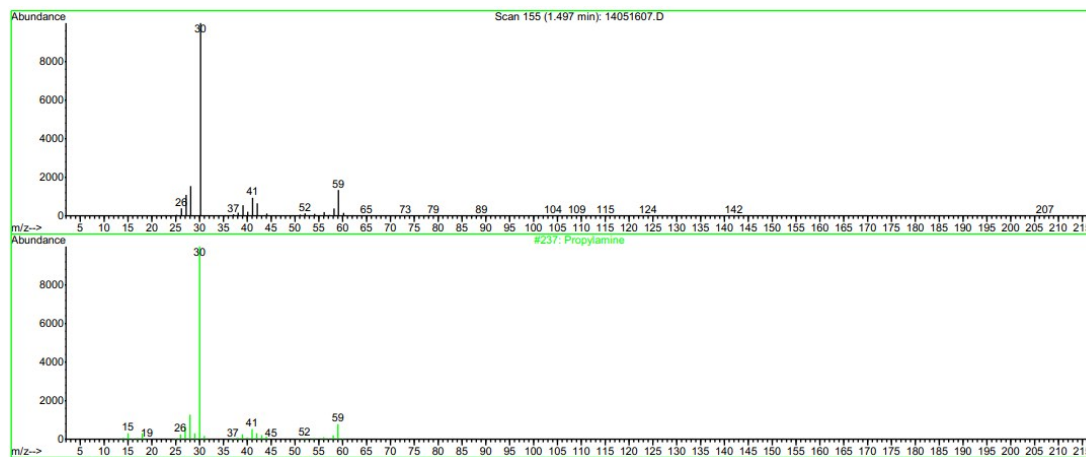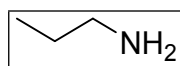

MS (EI, 70eV),  $m/z$  (rel abundance) : 30( $M^+$ , 100), 59(13), 41(9).

**Fig.S3 MS spectrum of dipropylamine**

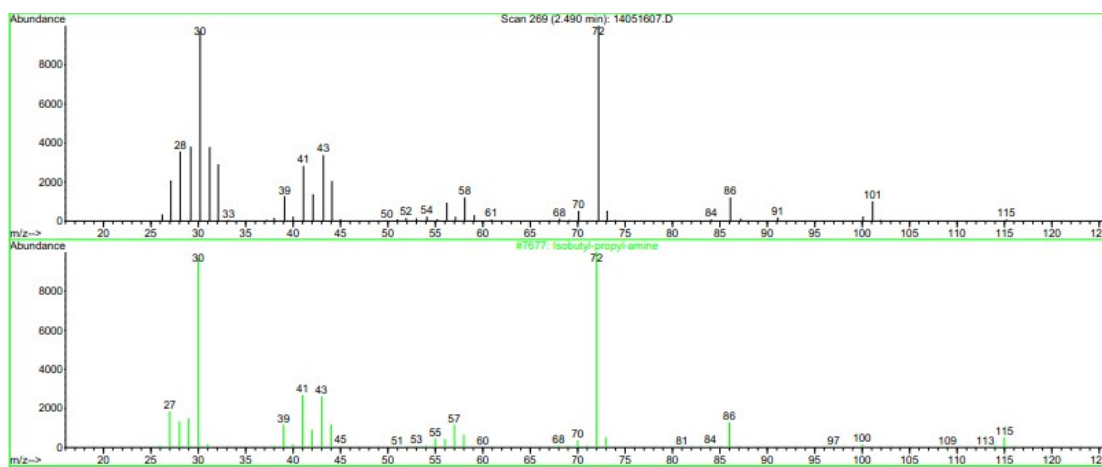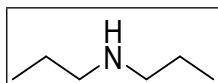

MS (EI, 70eV),  $m/z$  (rel abundance) : 72( $M^+$ , 100), 30(98), 28(37), 43(35), 86(12), 58(12).

**Fig.S4 MS spectrum of 3-(propylamino)propanenitrile**

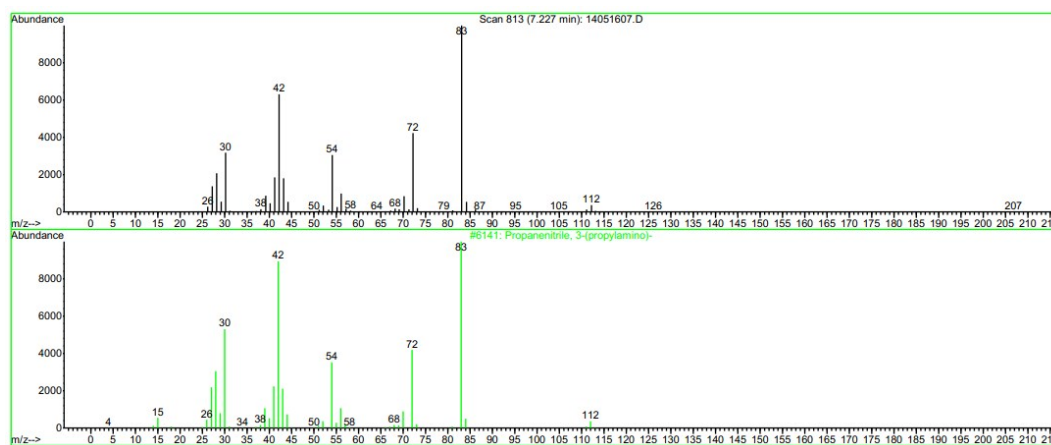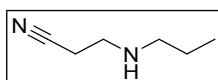

MS (EI, 70eV),  $m/z$  (rel abundance) : 83( $M^+$ , 100), 112(4), 72(43), 54(29), 42(64), 30(32).

**Fig.S5 MS spectrum of 3-(dipropylamino)propanenitrile**

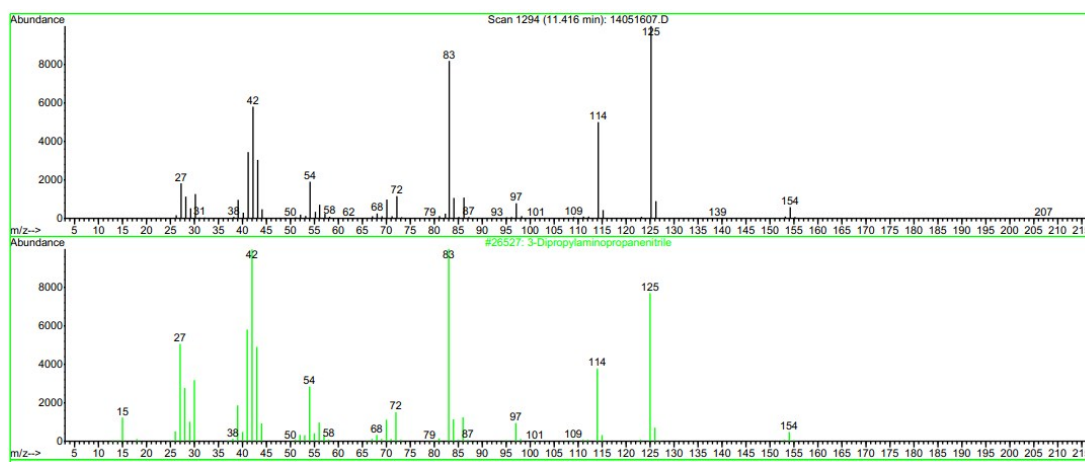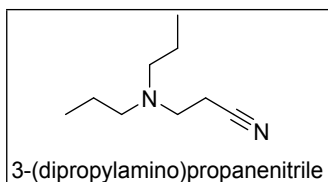

3-(dipropylamino)propanenitrile MS (EI, 70eV),  $m/z$  (rel abundance) : 125( $M^+$ , 100), 154(4), 114(51), 83(76), 42(60), 54(20), 27(17).

**Fig.S6 The adsorption site, energies (in kJ/mol) structural parameters of acrylonitrile adsorbed on Ni(111) and Pd(111)**

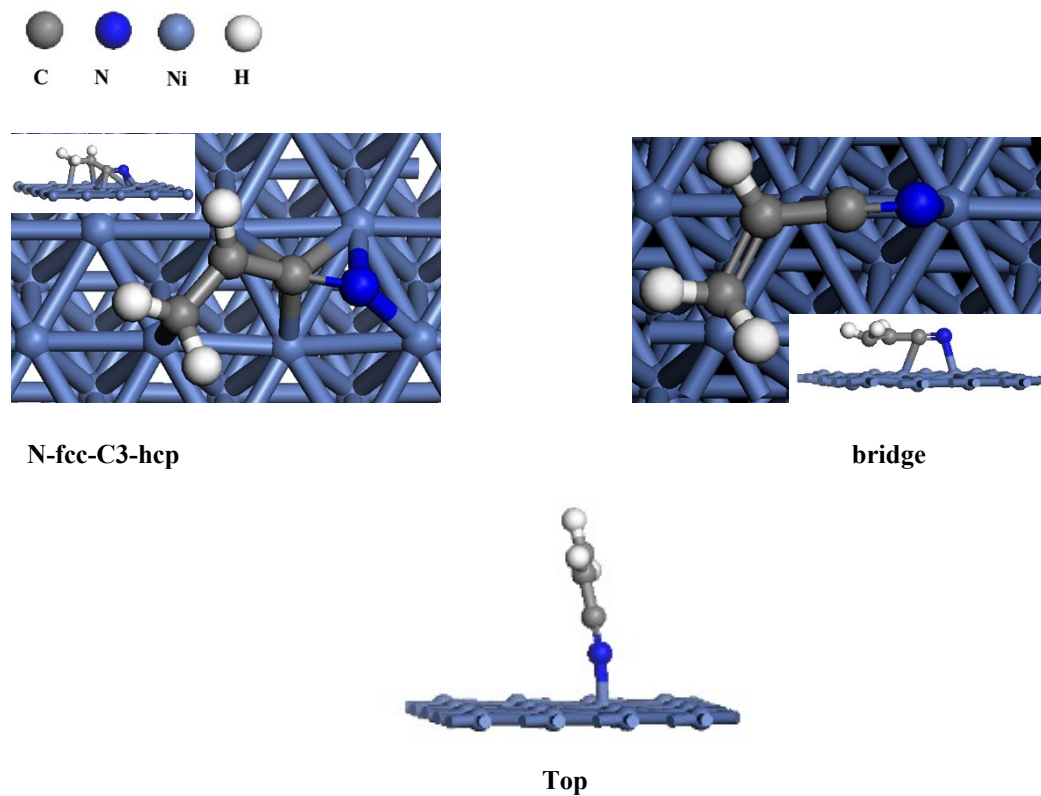

| bond         | Bond lengths(Å) |                           |                     |                  |
|--------------|-----------------|---------------------------|---------------------|------------------|
|              | AN              | AN-Ni(111)( N-fcc-C3-hcp) | AN-Ni(111)( bridge) | AN-Ni(111)( top) |
| <b>C1-C2</b> | 1.344           | 1.466                     | 1.481               | 1.347            |
| <b>C2-C3</b> | 1.427           | 1.451                     | 1.400               | 1.398            |
| <b>C3-N</b>  | 1.183           | 1.300                     | 1.223               | 1.180            |
| <b>C1-Ni</b> |                 | 1.981                     |                     |                  |
| <b>C2-Ni</b> |                 | 2.029                     |                     |                  |
| <b>C3-Ni</b> |                 | 2.135, 1.875              | 2.105               |                  |
| <b>N-Ni</b>  |                 | 1.940, 2.004              | 1.941               | 1.792            |

| Sites        | $E_{ad}$ |
|--------------|----------|
| N-fcc-C3-fcc | -154.8   |
| bridge       | -141.3   |
| Top          | -119.2   |

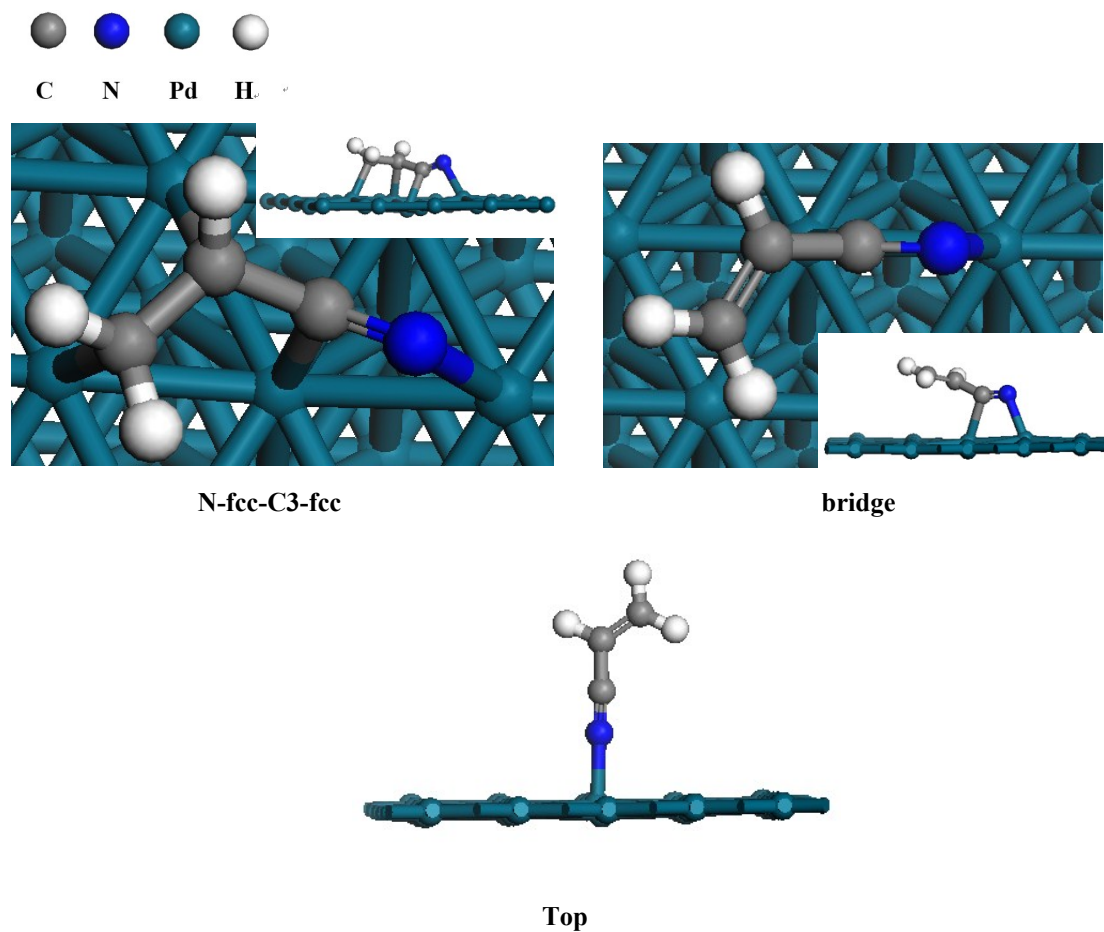

| bond         | Bond lengths(Å) |                           |                     |                  |
|--------------|-----------------|---------------------------|---------------------|------------------|
|              | AN              | AN-Pd(111)( N-fcc-C3-fcc) | AN-Pd(111)( bridge) | AN-Pd(111)( top) |
| <b>C1-C2</b> | 1.344           | 1.459                     | 1.353               | 1.345            |
| <b>C2-C3</b> | 1.427           | 1.463                     | 1.447               | 1.409            |
| <b>C3-N</b>  | 1.183           | 1.248                     | 1.228               | 1.179            |
| <b>C1-Pd</b> |                 | 2.146                     |                     |                  |

|              |       |       |       |
|--------------|-------|-------|-------|
| <b>C2-Pd</b> | 2.167 |       |       |
| <b>C3-Pd</b> | 2.141 | 2.135 |       |
| <b>N-Pd</b>  | 2.095 | 2.084 | 2.021 |

---

| <b>Sites</b> | <b><math>E_{ad}</math></b> |
|--------------|----------------------------|
| N-fcc-C3-fcc | -148.12                    |
| bridge       | -126.53                    |
| Top          | -120.9                     |



**Fig.S7 Energy profile of acrylonitrile hydrogenation to propionitrile on Ni(111)**

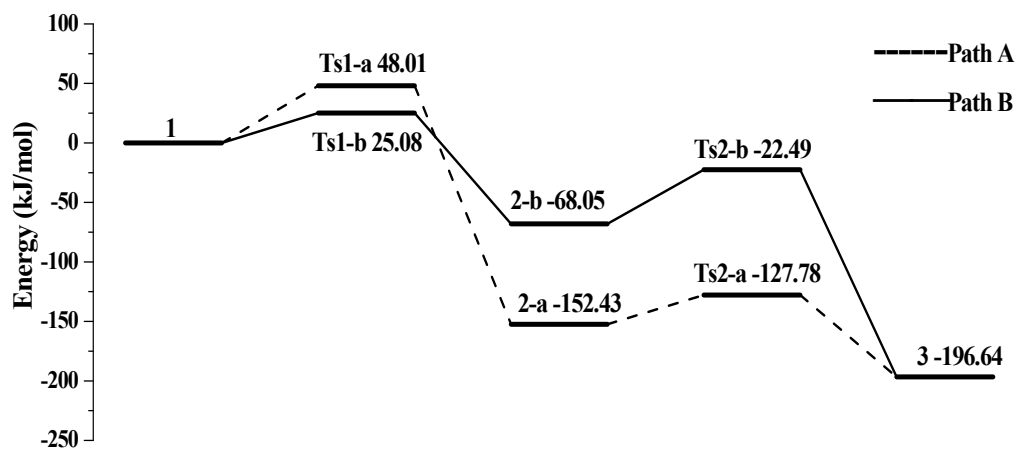

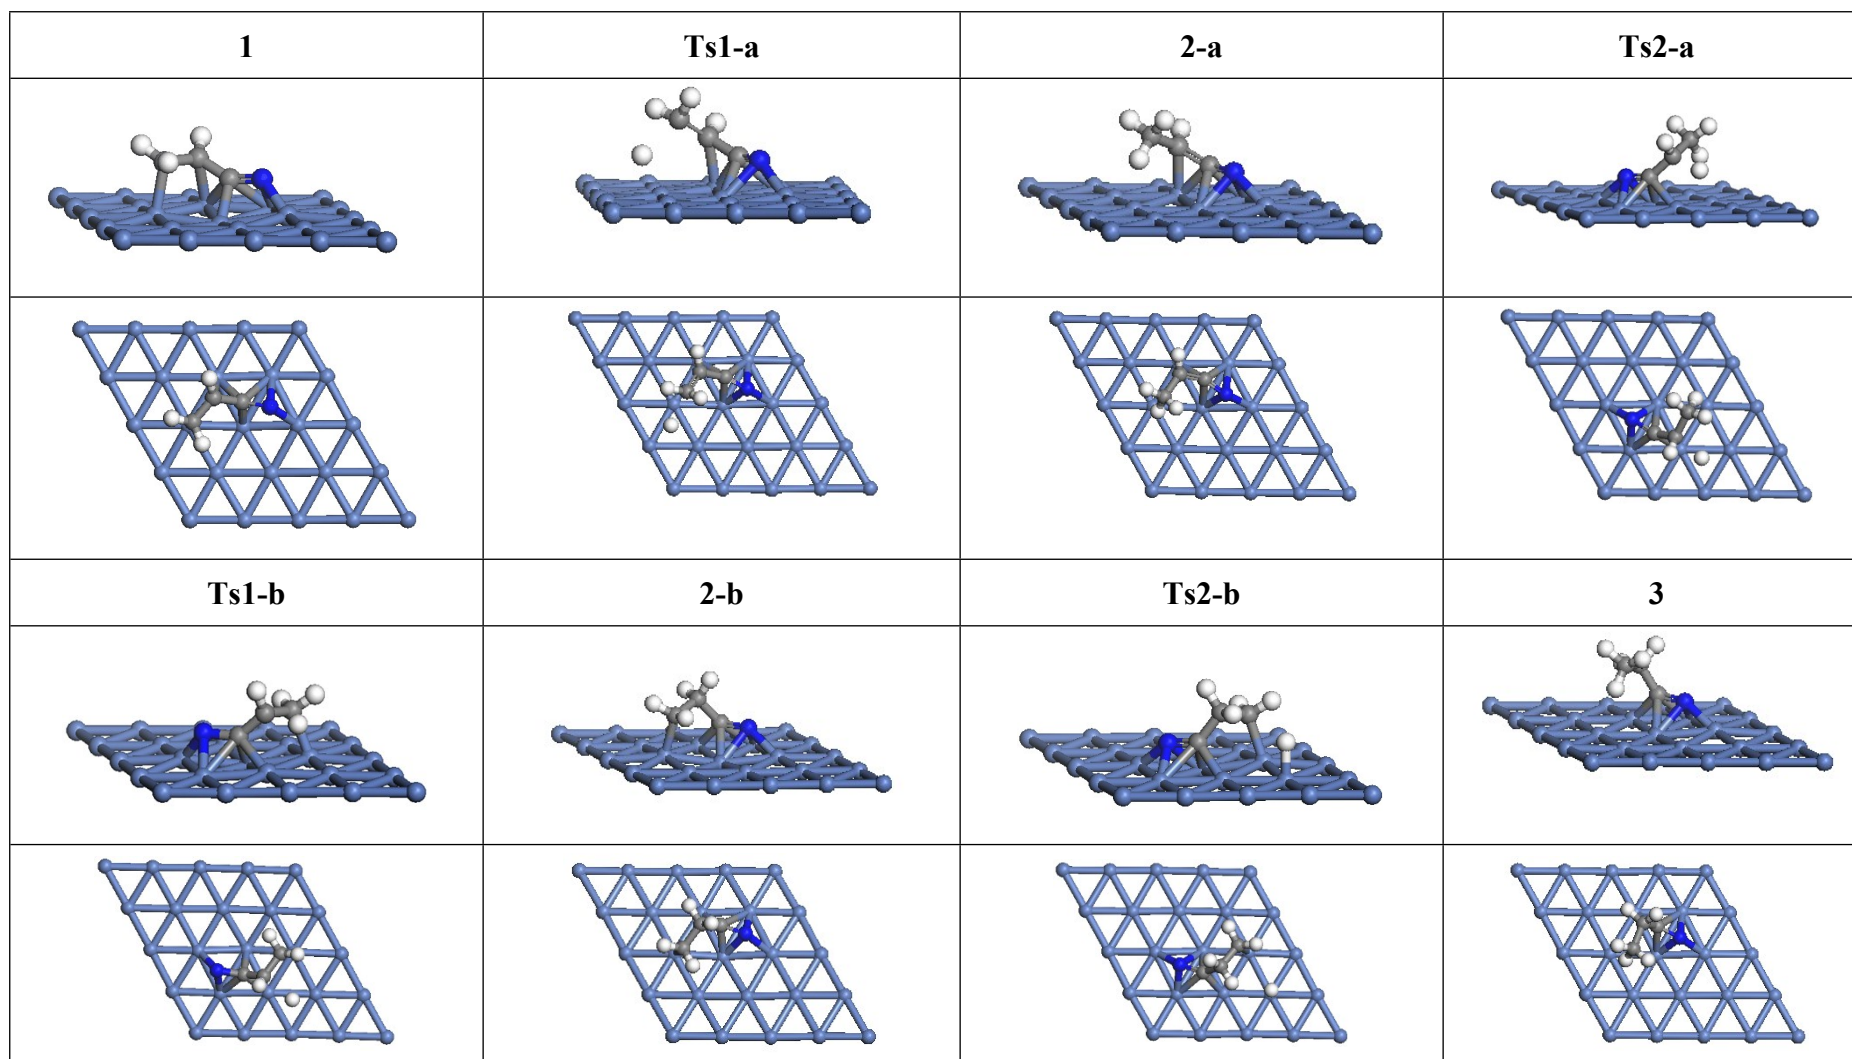

**Fig.S8 Energy profile of acrylonitrile hydrogenation to propionitrile on Pd(111)**

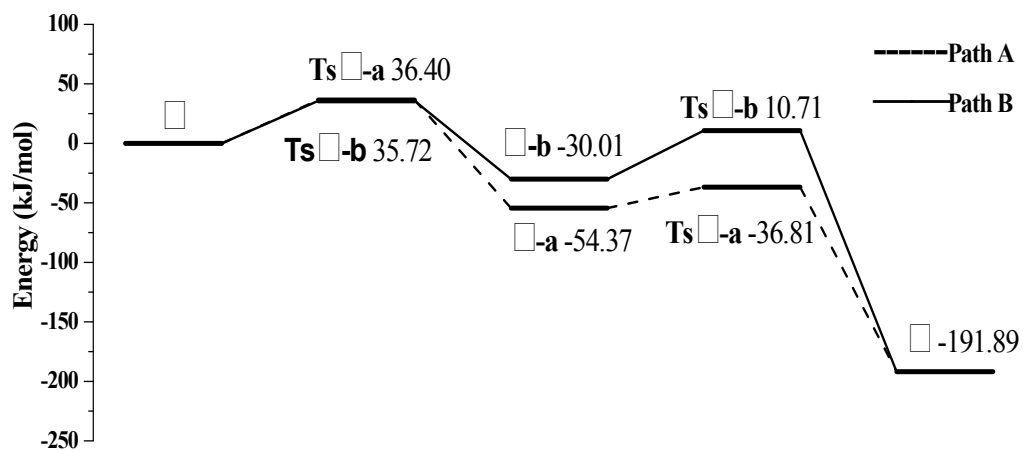

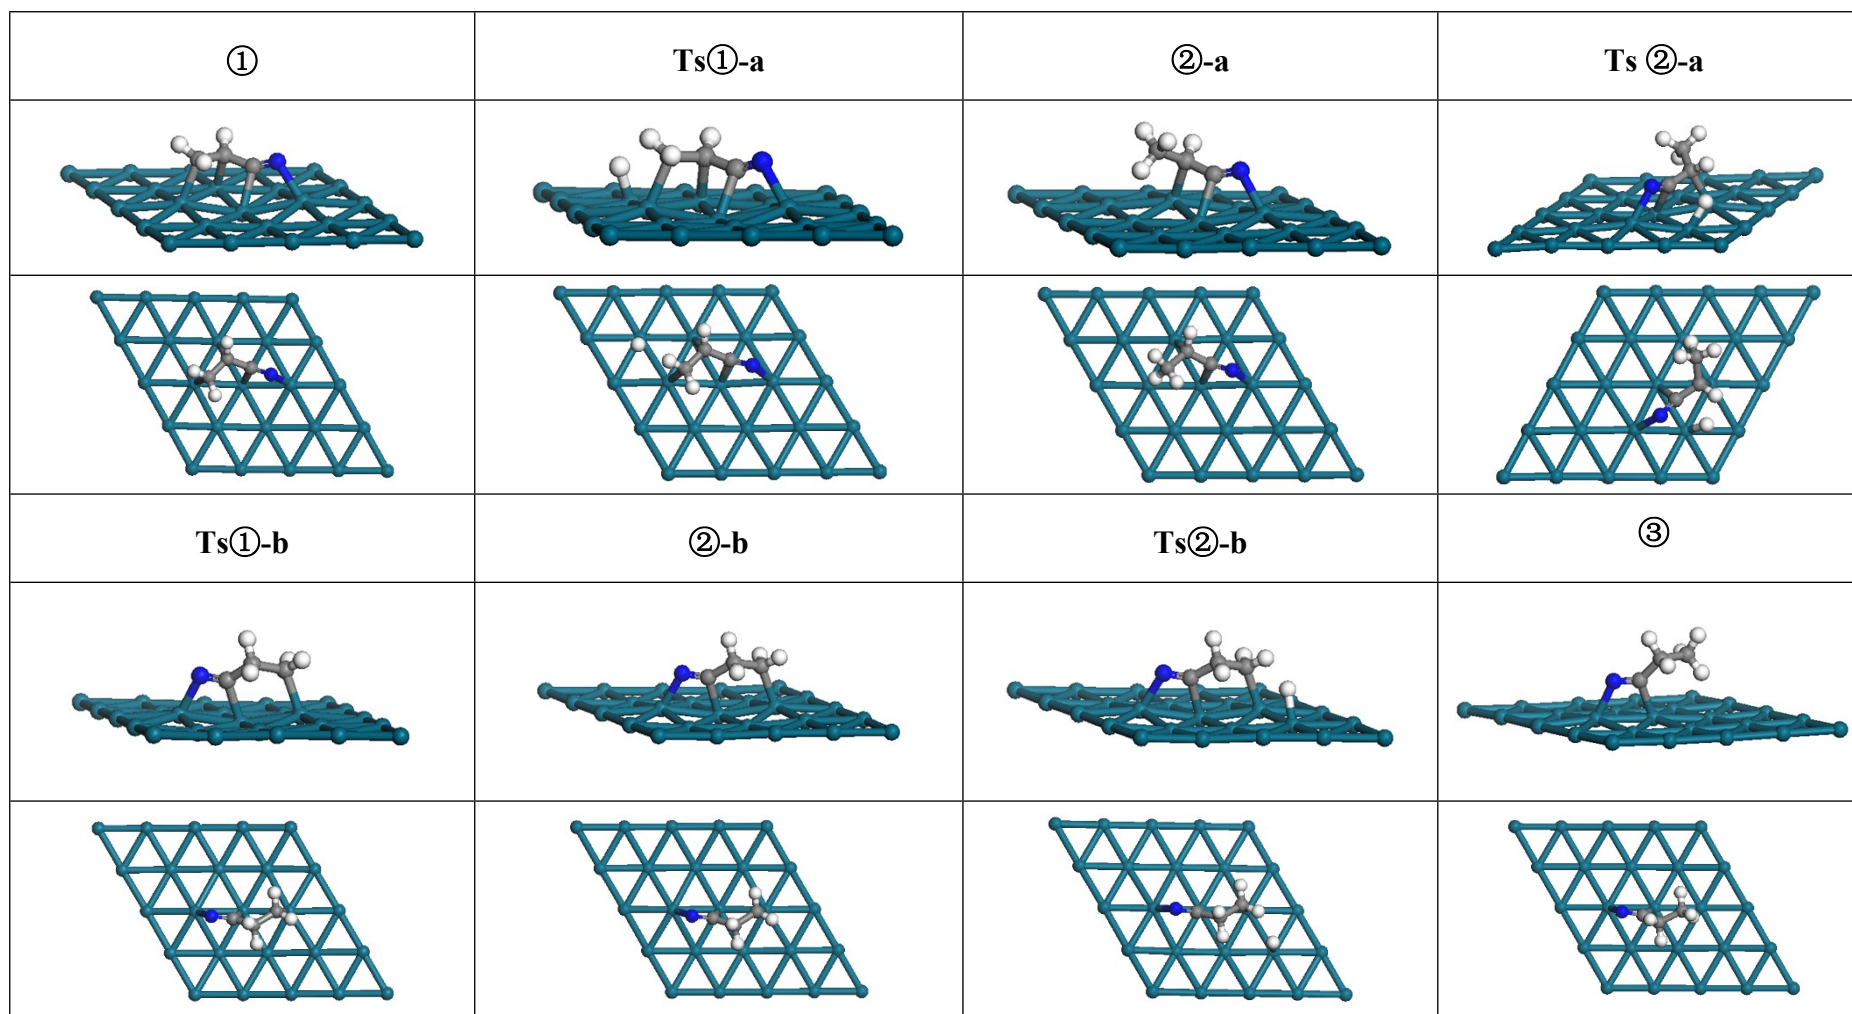

**Fig.S9 Energy profile of imine formation on Ni(111)**

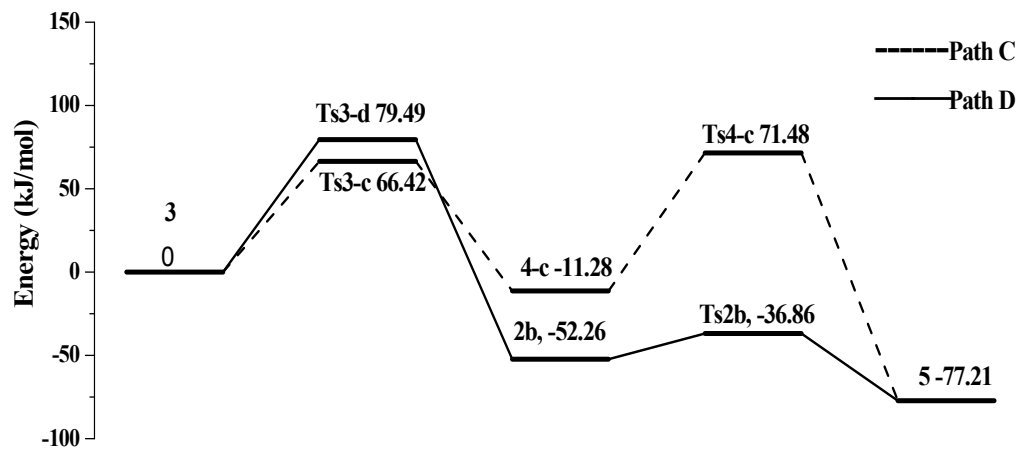

| 3                                                                                   | Ts3-c                                                                                | 4-c                                                                                   | Ts4-c                                                                                 |
|-------------------------------------------------------------------------------------|--------------------------------------------------------------------------------------|---------------------------------------------------------------------------------------|---------------------------------------------------------------------------------------|
| 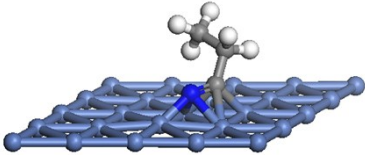   |    |    |    |
|    |    |    |    |
| Ts3-d                                                                               | 4-d                                                                                  | Ts4-d                                                                                 | 5                                                                                     |
|   |   |   |   |
|  |  |  |  |

**Fig.S10 Energy profile of imine formation on Pd(111)**

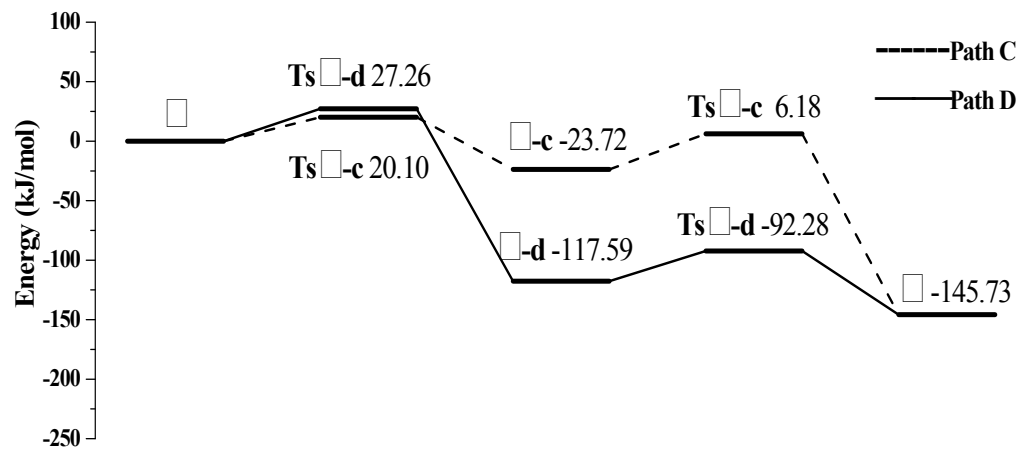

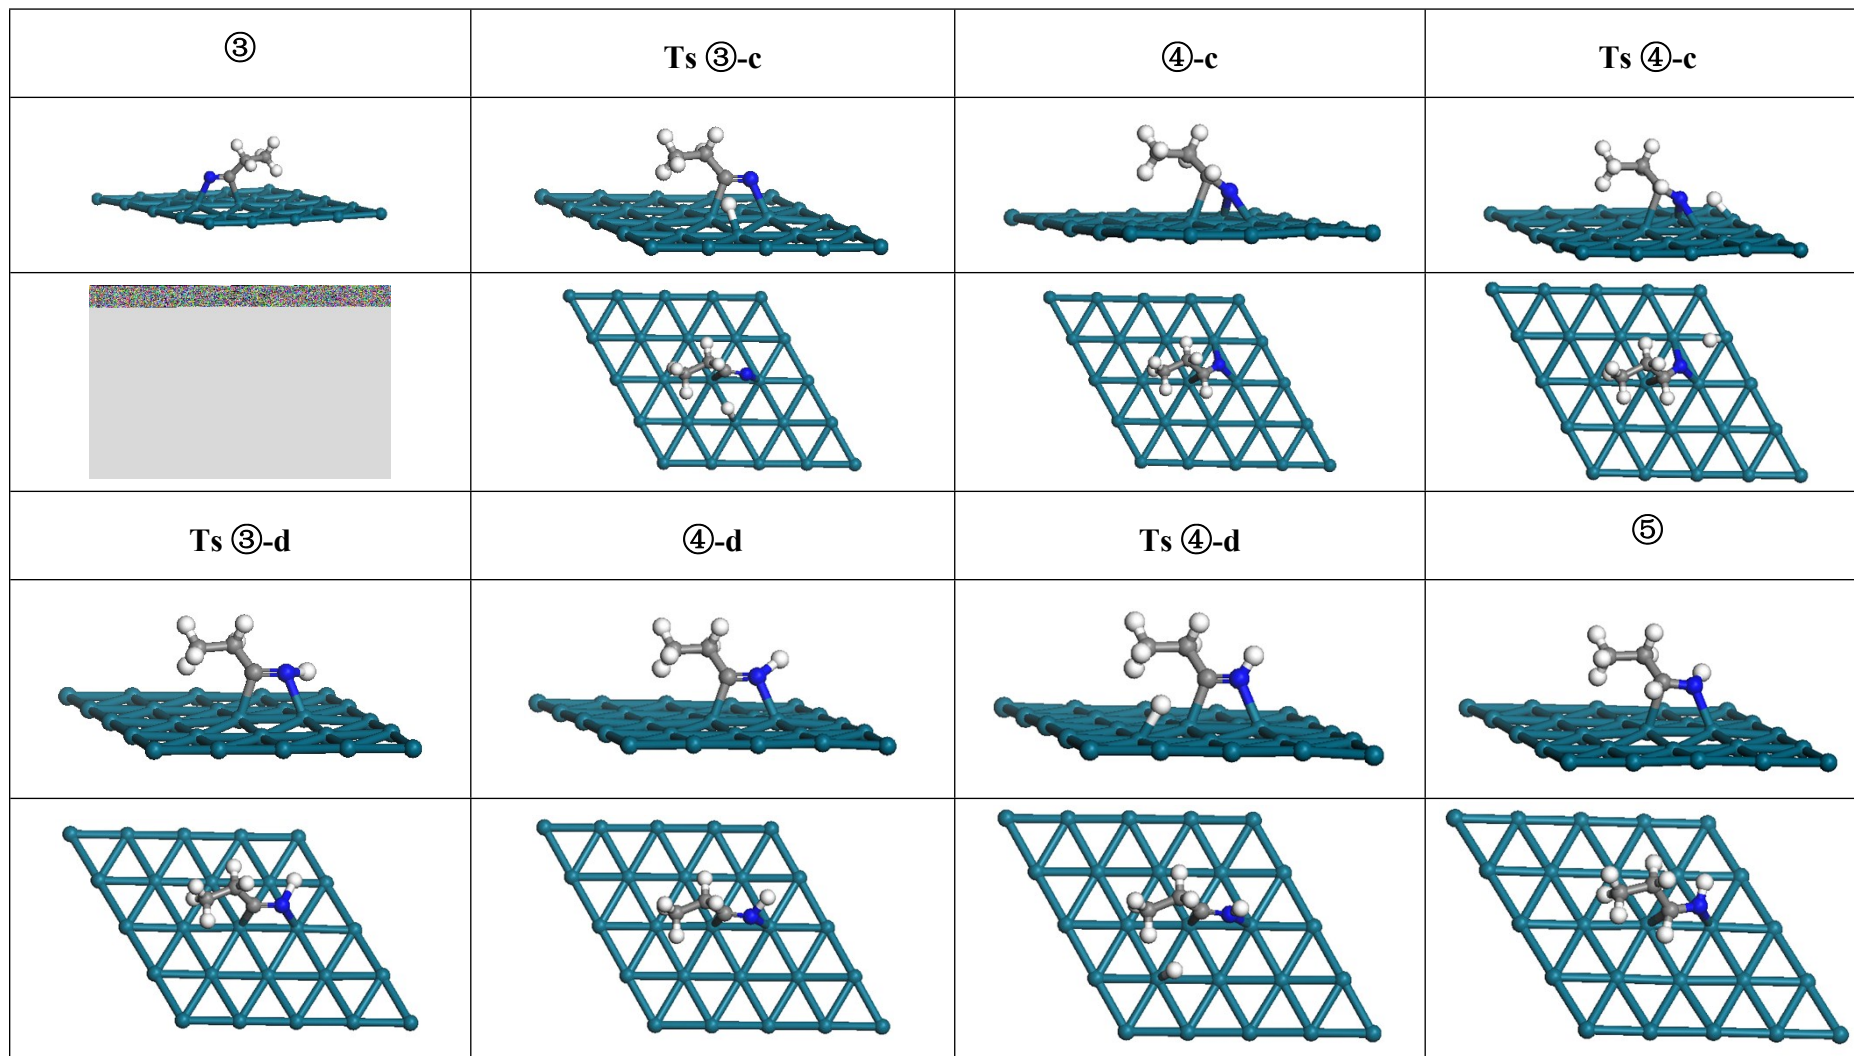



**Fig.S11 Energy profile of propylamine formation on Ni(111)**

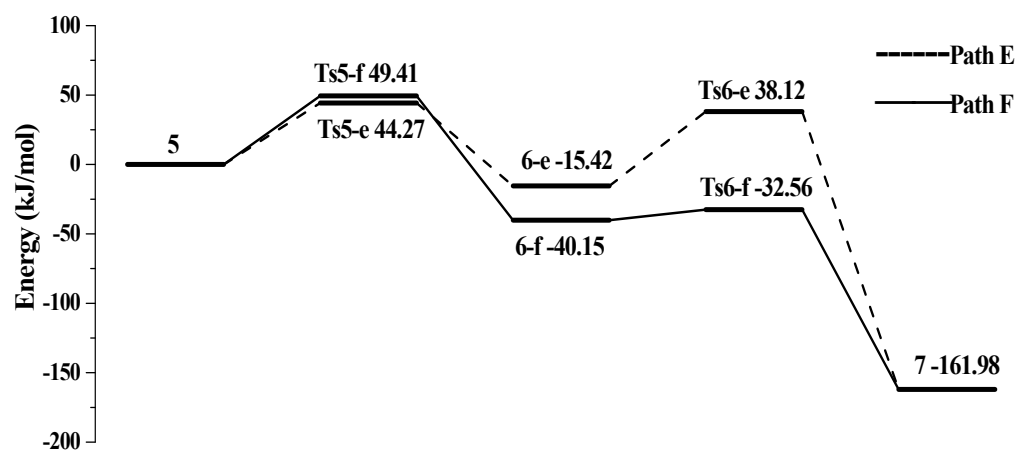

| 5                                                                                   | Ts5-e                                                                                | 6-e                                                                                   | Ts6-e                                                                                 |
|-------------------------------------------------------------------------------------|--------------------------------------------------------------------------------------|---------------------------------------------------------------------------------------|---------------------------------------------------------------------------------------|
|    |    |    |    |
|    |    |    |    |
| Ts5-f                                                                               | 6-f                                                                                  | Ts6-f                                                                                 | 7                                                                                     |
|    |    |    |    |
|  |  |  |  |

**Fig.S12 Energy profile of propylamine formation on Pd(111)**



| ③                                                                                   | Ts ③-c                                                                               | ④-c                                                                                   | Ts ④-c                                                                                |
|-------------------------------------------------------------------------------------|--------------------------------------------------------------------------------------|---------------------------------------------------------------------------------------|---------------------------------------------------------------------------------------|
|    |    |    |    |
|    |    |    |    |
| Ts ③-d                                                                              | ④-d                                                                                  | Ts ④-d                                                                                | ⑤                                                                                     |
|   |   |   |   |
|  |  |  |  |

**Fig.S13 Energy profile of propylene imine formation on Ni(111)**

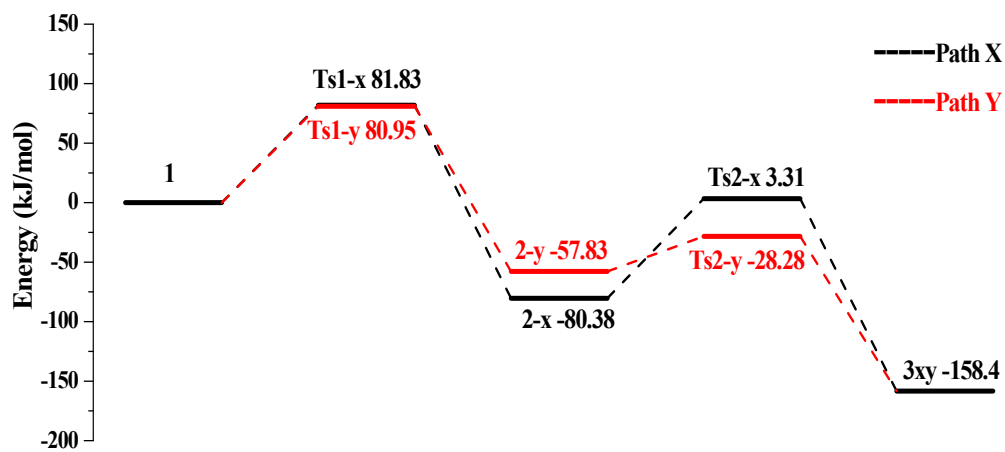

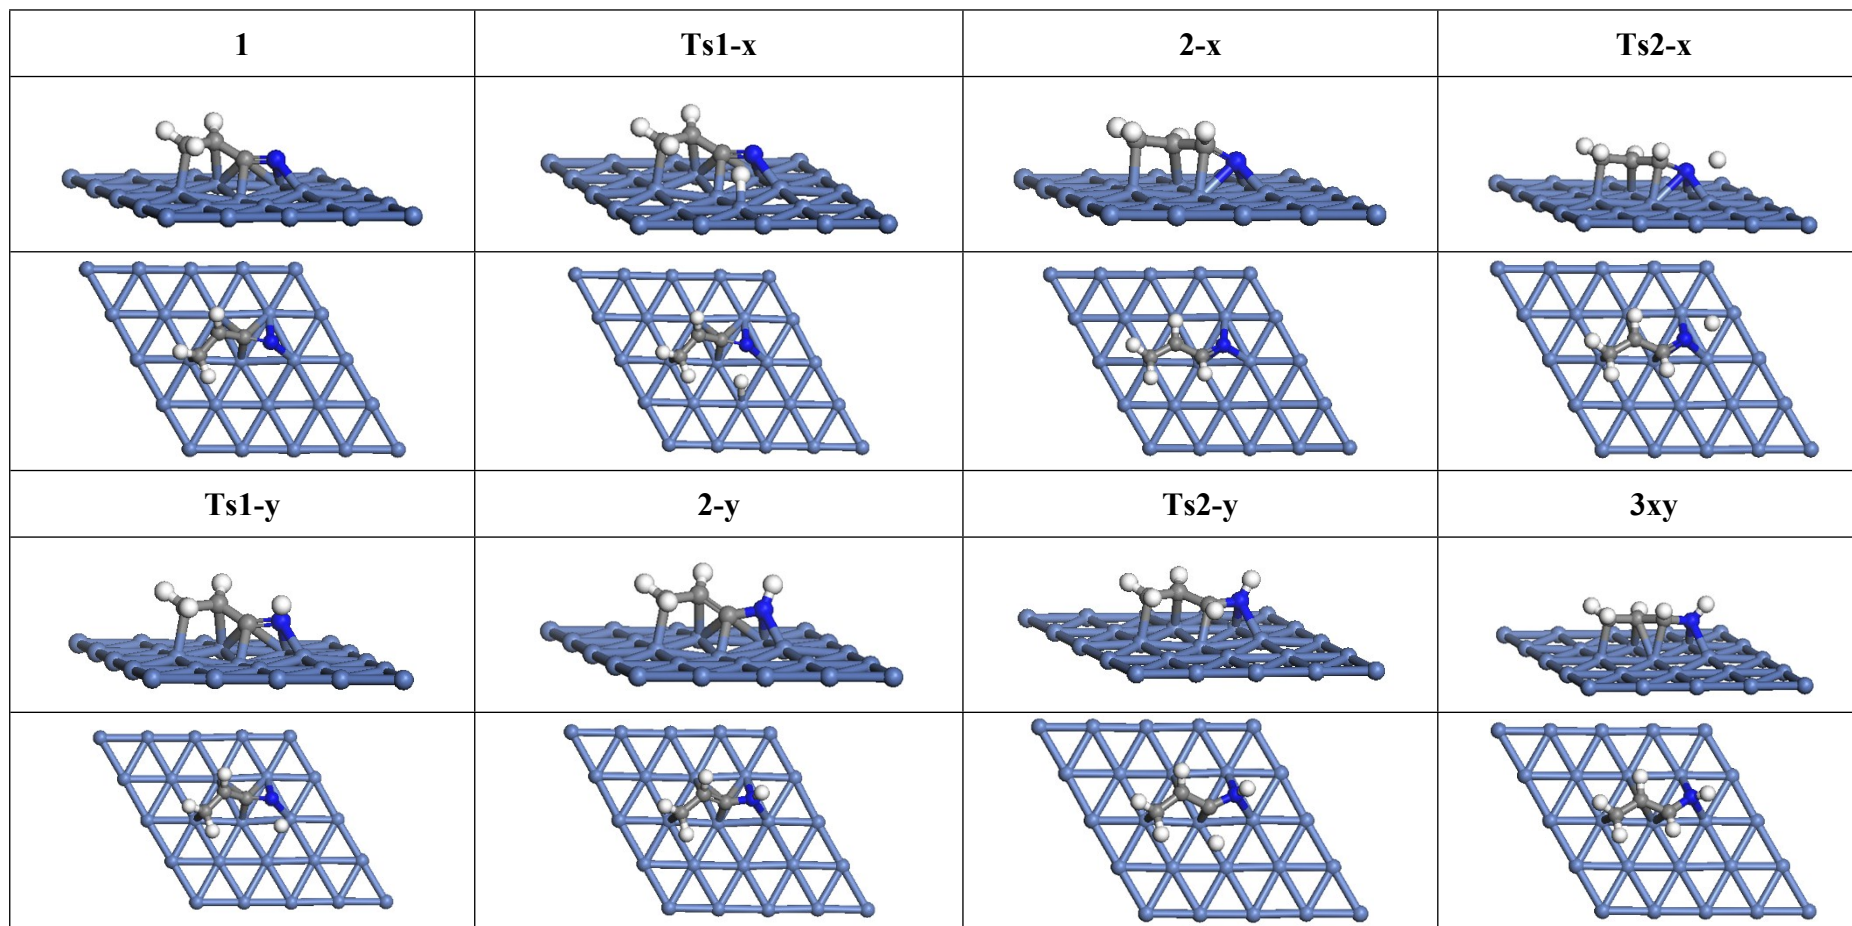

**Fig.S14 Energy profile of propylene imine formation on Pd(111)**

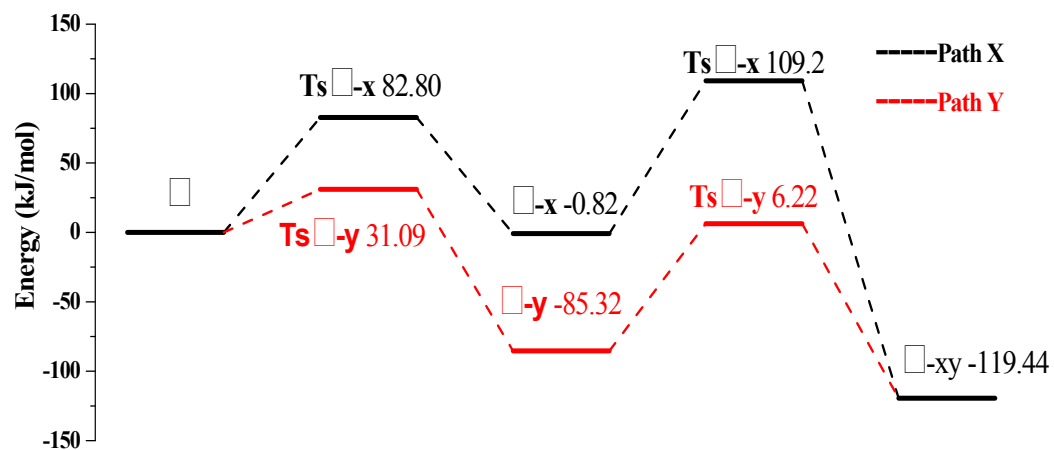

| ①                                                                                   | Ts ①-x                                                                               | ②-x                                                                                   | Ts ②-x                                                                                |
|-------------------------------------------------------------------------------------|--------------------------------------------------------------------------------------|---------------------------------------------------------------------------------------|---------------------------------------------------------------------------------------|
| 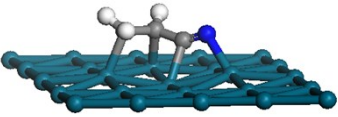   |    |    |    |
|    |    |    |    |
| Ts ①-y                                                                              | ②-y                                                                                  | Ts ②-y                                                                                | ③-xy                                                                                  |
|    |    |    |    |
|  |  |  |  |
